# Supplementary material for: Interactions Under Crowding Milieu: Chemical-Induced Denaturation of Myoglobin is Determined by the Extent of Heme Dissociation on Interaction with Crowders
Source: MDPI journal article supplement (doi:10.3390/biom10030490), 2020-03-23
Supplement: s1 [file s1]

## Interactions Under Crowding Milieu: Chemical-Induced Denaturation of Myoglobin is Determined by the Extent of Heme Dissociation on Interaction with Crowders

Khalida Nasreen <sup>1,†</sup>, Zahoor Ahmad Parray <sup>1,†</sup>, Shahzaib Ahamad <sup>1</sup>, Faizan Ahmad <sup>1</sup>,  
Anwar Ahmed <sup>2,3</sup>, Salman Freeh Alamery <sup>2</sup>, Tajamul Hussain <sup>2</sup>, Md. Imtaiyaz Hassan <sup>1</sup> and  
Asimul Islam <sup>1,\*</sup>

<sup>1</sup> Centre for Interdisciplinary Research in Basic Sciences, Jamia Millia Islamia, Jamia Nagar, New Delhi 110025, India

<sup>2</sup> Center of Excellence in Biotechnology Research, College of Science, King Saud University, Riyadh, Saudi Arabia

<sup>3</sup> Protein Research Chair, Department of Biochemistry, College of Science, King Saud University, Riyadh, Saudi Arabia

<sup>†</sup> Both the authors have contributed equally

<sup>\*</sup> Correspondence: aislam@jmi.ac.in; Tel.: 0091-9312812007

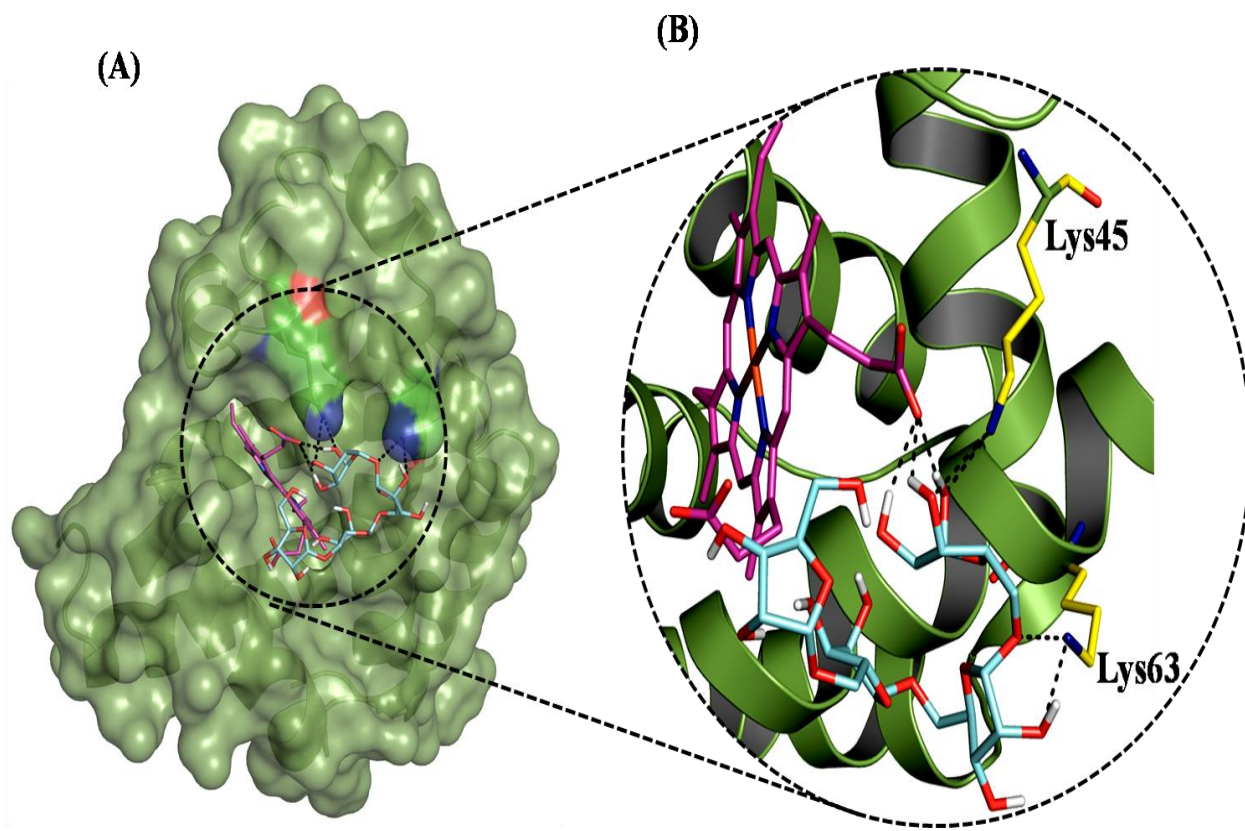

**Figure S1.** The docked complex of myoglobin (heme and its amino acid residues) with dextran 70 (dimer).

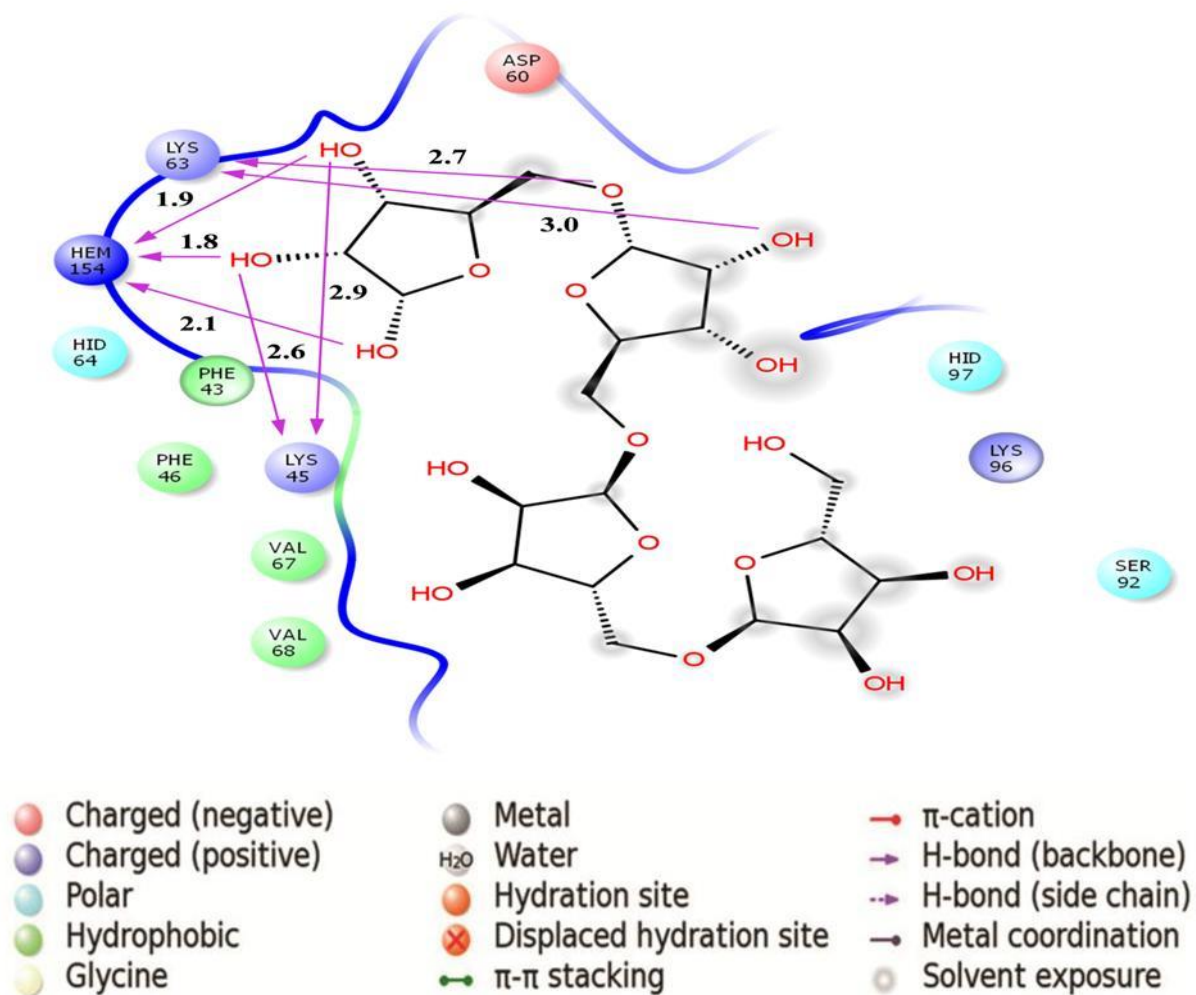

**Figure S2.** Two-dimensional plot interaction of myoglobin (heme and its amino acid residues) with dextran 70 (dimer) generated by maestro (schrodinger).
